# Supplementary material for: Microfluidic Paper-Based Blood Plasma Separation Device as a Potential Tool for Timely Detection of Protein Biomarkers
Source: MDPI journal article supplement (doi:10.3390/mi13050706), 2022-04-29

## S1. Electronic supplementary information

**Figure S1.** CAD geometry designs of BPS device papers. A) VF2 collection pad. B) MF1 detection pad. Dimensions are in millimeters.

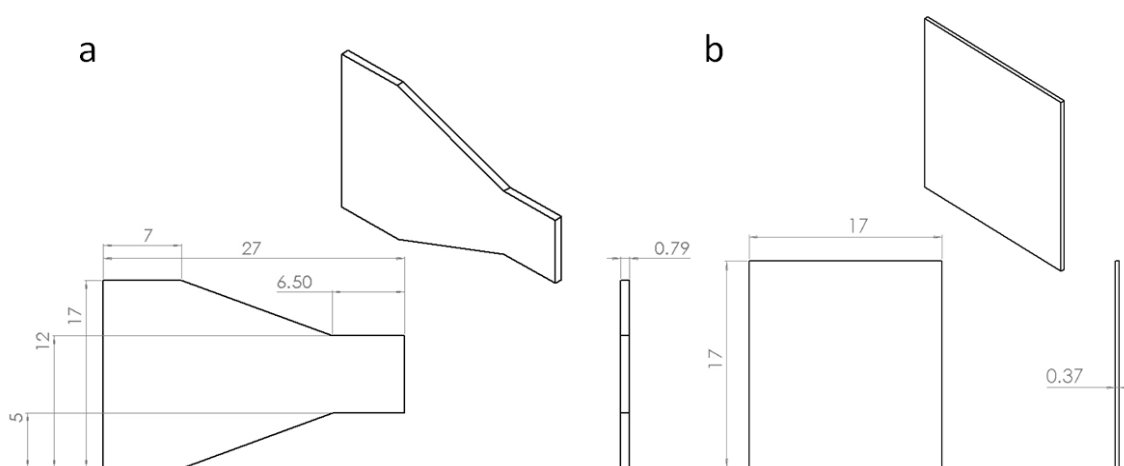

**Table S1.** Experimental runs for plasma volume over time.

| time | volume<br>( $\mu$ l) |
|------|----------------------|
| 120  | 38.14                |
| 60   | 21.26                |
| 160  | 47.31                |
| 180  | 48.19                |
| 40   | 11.60                |
| 180  | 50.53                |
| 160  | 44.68                |
| 180  | 46.53                |
| 80   | 30.63                |
| 220  | 56.78                |
| 200  | 52.58                |
| 100  | 35.80                |
| 60   | 24.68                |
| 80   | 29.56                |
| 200  | 51.60                |

|     |       |
|-----|-------|
| 80  | 27.41 |
| 220 | 53.46 |
| 100 | 35.41 |
| 120 | 35.51 |
| 120 | 39.60 |
| 20  | 5.36  |
| 220 | 57.95 |
| 40  | 13.95 |
| 140 | 42.53 |
| 60  | 20.58 |
| 100 | 33.85 |
| 140 | 46.53 |
| 200 | 53.85 |
| 20  | 4.39  |
| 40  | 16.09 |
| 20  | 7.41  |
| 160 | 45.75 |
| 140 | 42.34 |

**Figure S2.** Analysis of the structure of the residuals for the regression model of separated plasma volume over time.

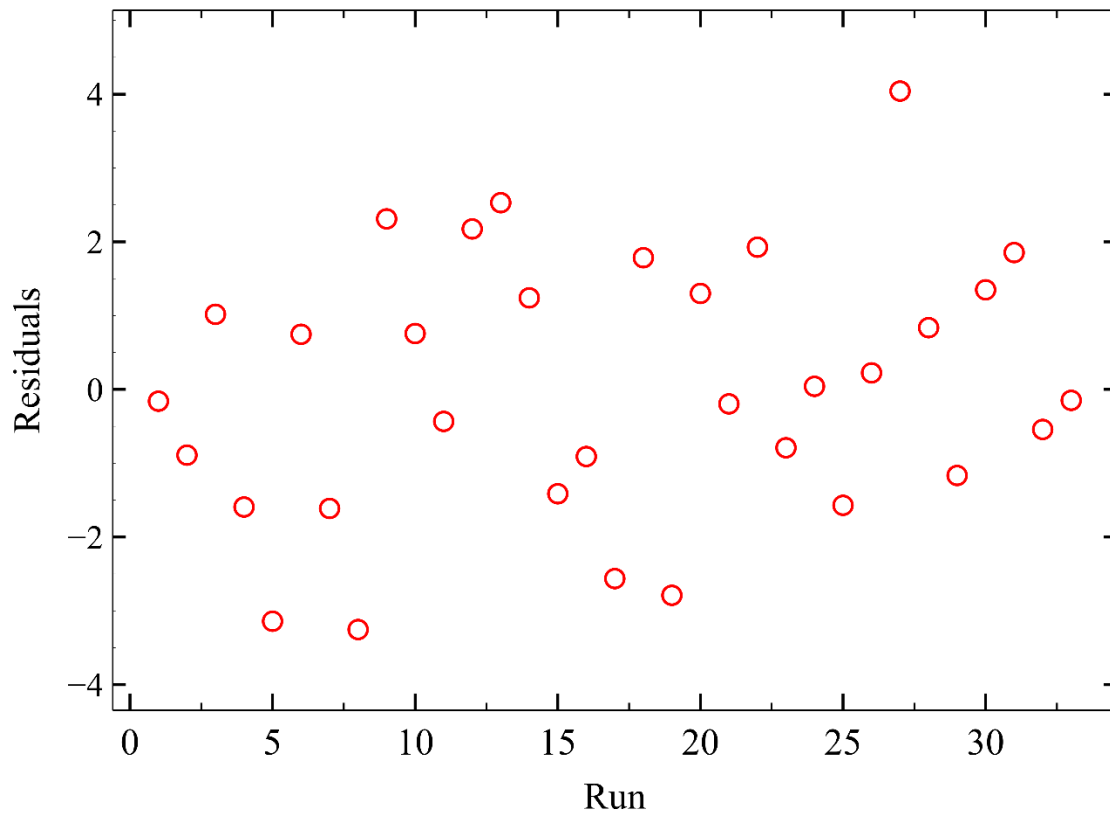

**Table S2.** Suitability analysis and Lack-of-fit test of Plasma volume over time regression model.

|                                                 |                |           |             |         |         |
|-------------------------------------------------|----------------|-----------|-------------|---------|---------|
| Coefficients                                    |                |           |             |         |         |
|                                                 | Least Squares  | Standard  | T           |         |         |
| Parameter                                       | Estimate       | Error     | Statistic   | P-Value |         |
| Intercept                                       | -4.09127       | 0.21332   | -19.1872    | 0.0000  |         |
| Slope                                           | 2.14627        | 0.04593   | 46.7197     | 0.0000  |         |
| Analysis of Variance                            |                |           |             |         |         |
| Source                                          | Sum of Squares | Df        | Mean Square | F-Ratio | P-Value |
| Model                                           | 76.7240        | 1         | 76.7240     | 2182.73 | 0.0000  |
| Residual                                        | 1.08966        | 31        | 0.0351505   |         |         |
| Total (Corr.)                                   | 77.8137        | 32        |             |         |         |
| Correlation Coefficient = 0.992974              |                |           |             |         |         |
| R-squared = 98.5996 percent                     |                |           |             |         |         |
| R-squared (adjusted for d.f.) = 98.5545 percent |                |           |             |         |         |
| Standard Error of Est. = 0.187485               |                |           |             |         |         |
| Mean absolute error = 0.14312                   |                |           |             |         |         |
| Durbin-Watson statistic = 1003617 (P=0.5508)    |                |           |             |         |         |
| Lag 1 residual autocorrelation = -0.0181408     |                |           |             |         |         |
| Analysis of Variance with Lack-of-Fit           |                |           |             |         |         |
| Source                                          | Sum of Squares | Df        | Mean Square | F-Ratio | P-Value |
| Model                                           | 76.7240        | 1         | 76.7240     | 2182.73 | 0.0000  |
| Residual                                        | 1.08966        | 31        | 0.0351505   |         |         |
| Lack-of-Fit                                     | 0.194738       | 9         | 0.0216375   | 0.53    | 0.8357  |
| Pure Error                                      | 0.89492722     | 0.0406785 |             |         |         |
| Total (Corr.)                                   | 77.8137        | 32        |             |         |         |

**Table S3.** S100B concentration, Optical density, temperature, and humidity values for each experimental run of the ELISA.

| Separation method | S100B (pg/ml) | Temperature (°C) | Humidity (%) | Optical Density | S100B       |
|-------------------|---------------|------------------|--------------|-----------------|-------------|
| Centrifugation    | 0             | 24.3             | 57           | 0.033           | -291.99371  |
| Centrifugation    | 312           | 24.1             | 55           | 0.103           | 115.20539   |
| Centrifugation    | 625           | 23.8             | 57           | 0.169           | 499.13597   |
| Centrifugation    | 1250          | 24.3             | 56           | 0.329           | 1429.87677  |
| Centrifugation    | 2500          | 24.5             | 57           | 0.524           | 2564.21712  |
| Centrifugation    | 5000          | 23.2             | 58           | 0.948           | 5030.68024  |
| Centrifugation    | 10000         | 24.1             | 55           | 1.945           | 10830.35885 |
| Centrifugation    | 20000         | 24.0             | 57           | 3.437           | 19509.51681 |
| Centrifugation    | 316           | 23.0             | 57           | 0.107           | 138.47391   |
| Centrifugation    | 562           | 24.2             | 55           | 0.147           | 371.15911   |
| BPS               | 562           | 23.9             | 55           | 0.152           | 400.24476   |
| BPS               | 0             | 24.5             | 57           | 0.047           | -210.55389  |
| BPS               | 316           | 23.4             | 57           | 0.112           | 167.55956   |
| BPS               | 562           | 23.1             | 57           | 0.158           | 435.14754   |
| BPS               | 0             | 23.0             | 57           | 0.037           | -268.72519  |
| Centrifugation    | 1000          | 24.1             | 55           | 0.296           | 1237.91148  |
| BPS               | 1000          | 24.2             | 56           | 0.320           | 1377.5226   |
| BPS               | 562           | 23.5             | 57           | 0.143           | 347.89059   |
| BPS               | 1000          | 22.9             | 57           | 0.269           | 1080.84897  |
| Centrifugation    | 562           | 24.2             | 56           | 0.155           | 417.69615   |
| BPS               | 1000          | 23.7             | 57           | 0.303           | 1278.63139  |
| BPS               | 316           | 22.7             | 57           | 0.129           | 266.45077   |
| Centrifugation    | 562           | 23.2             | 57           | 0.149           | 382.79337   |
| Centrifugation    | 1000          | 23.2             | 55           | 0.288           | 1191.37444  |
| BPS               | 316           | 22.7             | 57           | 0.099           | 91.93687    |
| BPS               | 0             | 24.0             | 56           | 0.032           | -297.81084  |
| Centrifugation    | 316           | 22.8             | 57           | 0.105           | 126.83965   |
| Centrifugation    | 1000          | 23.7             | 58           | 0.279           | 1139.02027  |
| Centrifugation    | 316           | 22.8             | 56           | 0.118           | 202.46234   |

**Figure S3.** Analysis of the structure of the residuals for the standard S100B detection model using ELISA.

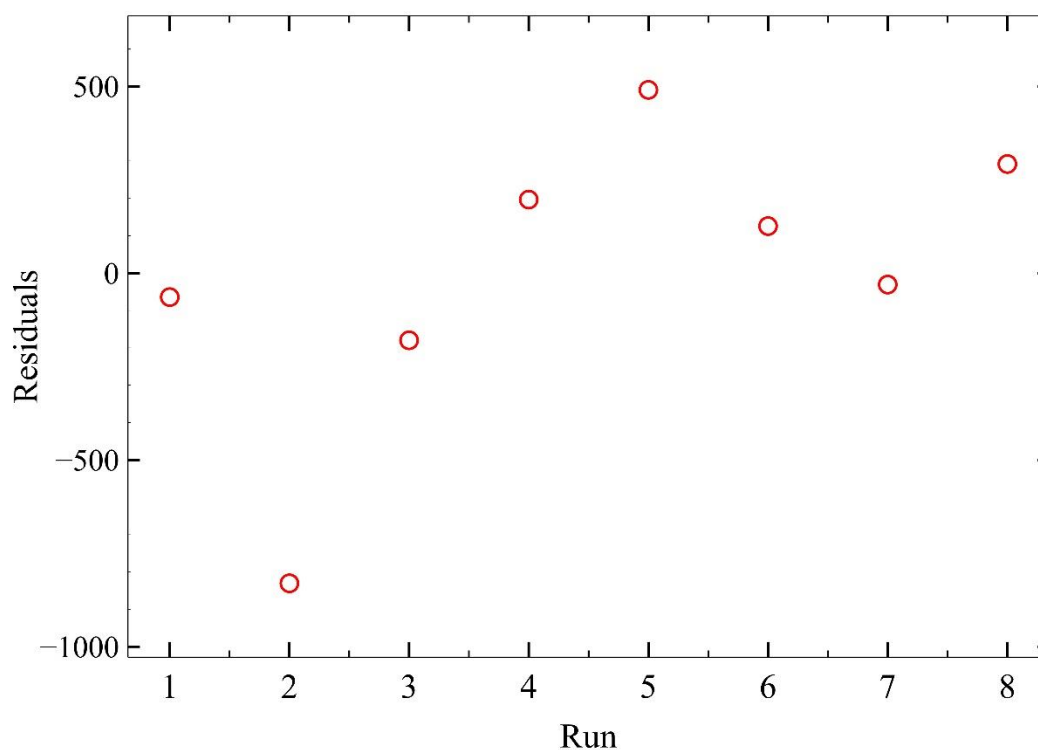

**Table S4.** Suitability analysis of the ELISA S100B detection standard model.

| Coefficients         |                |          |             |         |         |
|----------------------|----------------|----------|-------------|---------|---------|
|                      | Least Squares  | Standard | T           |         |         |
| Parameter            | Estimate       | Error    | Statistic   | P-Value |         |
| Intercept            | -483.959       | 198.46   | -2.43857    | 0.0406  |         |
| Slope                | 5817.13        | 136.473  | 42.6248     | 0.0000  |         |
| Analysis of Variance |                |          |             |         |         |
| Source               | Sum of Squares | Df       | Mean Square | F-Ratio | P-Value |
| Model                | 3.35311E8      | 1        | 3.35311E8   | 1816.88 | 0.0000  |
| Residual             | 1.10732E6      | 6        | 184553.     |         |         |
| Total (Corr.)        | 3.36418E8      | 7        |             |         |         |

Correlation Coefficient = 0.998353  
R-squared = 99.6709 percent  
R-squared (adjusted for d.f.) = 99.616 percent  
Standard Error of Est. = 429.597  
Mean absolute error = 276.284  
Durbin-Watson statistic = 1.35445 (P=0.2184)  
Lag 1 residual autocorrelation = 0.282416

**Table S5.** Pearson correlation between OD and temperature and humidity.

```
Pearson's product-moment correlation
cor.test(DOPP,temp)
data: DOPP and temp
t = 0.15285, df = 10, p-value = 0.8816
alternative hypothesis: true correlation is not equal to 0
95 percent confidence interval:
 -0.5406022  0.6054055
sample estimates:
      cor
0.04827767

> cor.test(DOPP,humidity)

Pearson's product-moment correlation

data: DOPP and humidity
t = -0.24829, df = 10, p-value = 0.8089
alternative hypothesis: true correlation is not equal to 0
```

95 percent confidence interval:

-0.6241394 0.5189379

sample estimates:

cor

-0.07827579

**Figure S4.** Analysis of the structure of the residuals for the t-test of conventional and paper-based BPS runs for measuring S100B using ELISA.

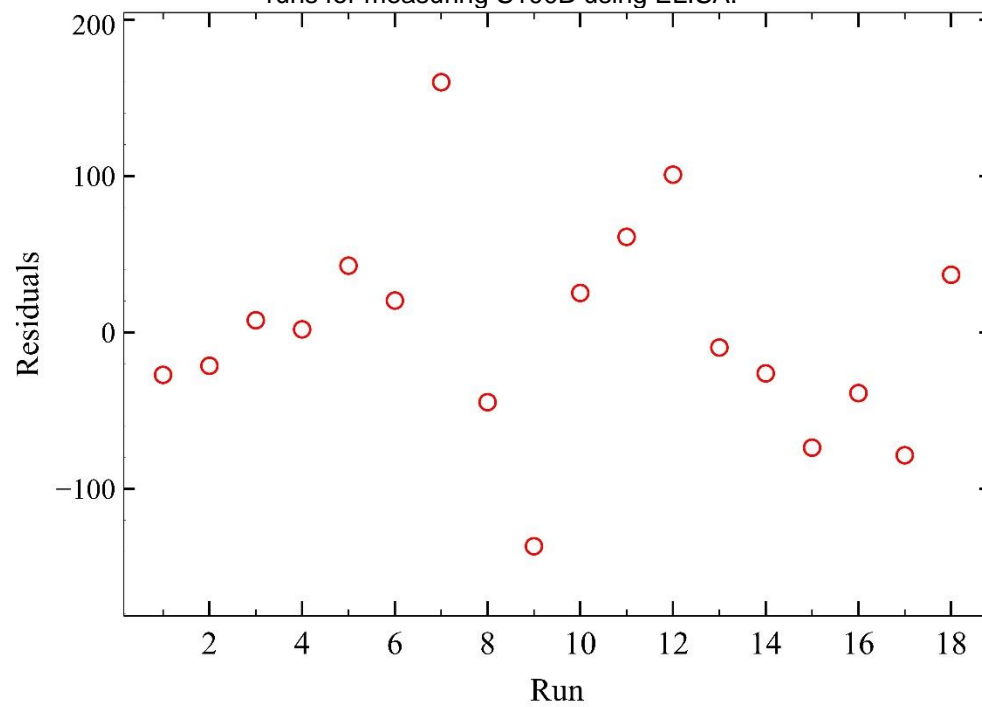

Supplement: s1 [file s1]
